# Supplementary material for: Impact of proximal cavities and primary molar absence on space in the dental arches
Source: PeerJ. 2020 Aug 5;8:e8924. doi: 10.7717/peerj.8924 (PMC7414765; doi:10.7717/peerj.8924)
Supplement: Supplemental Information 1 [file peerj-08-8924-s001.xlsx]

## Sheet: Plan1
Table 1. Intra-examiner reliability, mean difference between measurements (in mms) and their 95% confidence interval for maxilla and mandible C+D+E and D+E spaces.
Arch	Space	r	P	Mean difference	95% CI
Maxilla	C+D+E	0.99	<0.001	0.03	[-0.04; 0.09]
	D+E	0.99	<0.001	0.01	[-0.04; 0.05]
Mandible	C+D+E	0.99	<0.001	0.05	[-0.02; 0.12]
	D+E	0.99	<0.001	0.00(?)	[-0.04; 0.05]
