# Supplementary material for: Impact of proximal cavities and primary molar absence on space in the dental arches
Source: PeerJ. 2020 Aug 5;8:e8924. doi: 10.7717/peerj.8924 (PMC7414765; doi:10.7717/peerj.8924)
Supplement: Supplemental Information 2 [file peerj-08-8924-s002.xlsx]

## Sheet: Plan1
Table 2. Comparison of right and left side of the C+D+E and D+E space (mm) accordingly to primary molars status.
		Maxilla							Mandible
		Right			Left		P		Right			Left		P
	Distance	Mean ±SD	N		Mean ±SD	N			Mean ±SD	N		Mean ±SD	N
NPC	D+E space	16.93 ±0.97	65		16.65 ±1.04	101	0.09		18.40 ±0.92	63		18.30 ±1.07	62	0.581
	C+D+E space	24.05 ±1.26	65		23.80 ±1.39	101	0.245		24.47 ±1.22	63		24.21 ±1.52	62	0.307
PCCP	D+E space	16.67 ±0.97	55		16.76 ±0.97	41	0.64		18.04 ±0.97	46		18.15 ±0.89	43	0.576
	C+D+E space	23.97 ±1.37	55		24.15 ±1.31	41	0.519		24.12 ±1.38	46		24.08 ±1.34	42	0.89
PCWC	D+E space	16.39 ±1.06	85		16.27 ±0.91	64	0.456		17.54 ±1.20	77		17.49 ±1.13	83	0.807
	C+D+E space	23.45 ±1.55	85		23.36 ±1.33	64	0.698		23.65 ±1.49	77		23.41 ±1.56	83	0.329
PMA	D+E space	15.07 ±2.79	25		15.50 ±1.69	23	0.528		16.75 ±1.81	46		16.88 ±2.23	43	0.768
	C+D+E space	22.46 ±3.19	25		22.05 ±3.70	24	0.681		22.88 ±1.90	46		22.84 ±2.17	42	0.928
NPC - non proximal cavity; PCCP - proximal cavity with buccal or lingual surface contact point to adjacent tooth; PCWC - proximal cavity without contact point to adjacent tooth; PL - premature loss of primary molar from carious lesions.
