# Supplementary material for: Impact of proximal cavities and primary molar absence on space in the dental arches
Source: PeerJ. 2020 Aug 5;8:e8924. doi: 10.7717/peerj.8924 (PMC7414765; doi:10.7717/peerj.8924)
Supplement: Supplemental Information 3 [file peerj-08-8924-s003.xlsx]

## Sheet: Plan1
Table 3. C+D+E and D+E spaces (mean±sd in mm) in the maxilla and mandible by primary molar status
		NPC				PCCP				PCWP				PMA
Variable		Mean ± SD	95% CI	N		Mean ± SD	95% CI	N		Mean ± SD	95% CI	N		Mean ± SD	95% CI	N	P
Maxilla	D+E space	16.76 ±1.02ᵃ	16.60, 16.91	167		16.70 ±0.97ᵃᵇ	16.51, 16.90	96		16.34 ±1.00ᵇ	16.18, 16.50	150		15.28 ±2.32ᶜ	14.61, 15.95	48	<0.001
	C+D+E space	23.89 ±1.34ᵃ	23.69, 24.10	167		24.05 ± 1.34ᵃ	23.77, 24.32	96		23.41 ±1.45ᵇ	23.17, 23.64	150		22.57 ±2.67ᶜ	21.80, 23.35	48	<0.001
Mandible	D+E space	18.35 ±0.99ᵃ	18.18, 18.53	125		18.09 ± 0.93ᵃ	17.90, 18.29	89		17.51 ±1.16ᵇ	17.33, 17.69	160		16.82 ±1.99ᶜ	16.41, 17.24	91	<0.001
	C+D+E space	24.34 ±1.38ᵃ	24.10, 24.58	125		24.10 ±1.35ᵃ	23.82, 24.39	88		23.52 ±1.53ᵇ	23.28, 23.76	160		22.86 ±2.00ᶜ	22.44, 23.28	90	<0.001
NPC - non proximal cavity; PCCP - proximal cavity with buccal or lingual surface contact point to adjacent tooth; PCWC - proximal cavity without contact point to adjacent tooth; PL - premature loss of primary molar from carious lesions.
Groups with the same letter within the line do not differ significantly.
